# Supplementary material for: Raising rare disease awareness using red flags, role play simulation and patient educators: results of a novel educational workshop on Raynaud phenomenon and systemic sclerosis
Source: PubMed Central journal article supplement (PMC7310378; doi:10.1186/s13023-020-01439-z), 2020-06-23
Supplement: 13023_2020_1439_MOESM2_ESM.pdf [file 13023_2020_1439_MOESM2_ESM.pdf]

**Satisfaction survey submitted to the participants at the end of the workshop.**

|                                                                                                                                                                                                                                                                                                                                                                                |
|--------------------------------------------------------------------------------------------------------------------------------------------------------------------------------------------------------------------------------------------------------------------------------------------------------------------------------------------------------------------------------|
| <p>1. Before this training, had you ever met a patient with Raynaud phenomenon?</p> <p><input type="radio"/> Yes    <input type="radio"/> No    <input type="radio"/> Other: _____</p>                                                                                                                                                                                         |
| <p>2. Before this training, had you ever met a patient with systemic sclerosis?</p> <p><input type="radio"/> Yes    <input type="radio"/> No    <input type="radio"/> Other: _____</p>                                                                                                                                                                                         |
| <p>3. Before this training, had you ever participated to an educational role play?</p> <p><input type="radio"/> Yes    <input type="radio"/> No    <input type="radio"/> Other: _____</p>                                                                                                                                                                                      |
| <p>4. During this training, were you an actor or an observer?</p> <p><input type="radio"/> Actor    <input type="radio"/> Observer    <input type="radio"/> Other: _____</p>                                                                                                                                                                                                   |
| <p>5. Overall, are you satisfied with this workshop?</p> <p style="text-align: center;">1    2    3    4</p> <p>Not satisfied at all    <input type="radio"/>    <input type="radio"/>    <input type="radio"/>    <input type="radio"/>    Extremely satisfied</p>                                                                                                            |
| <p>6. How stressful was this workshop to you?</p> <p style="text-align: center;">1    2    3    4</p> <p>Not stressful at all    <input type="radio"/>    <input type="radio"/>    <input type="radio"/>    <input type="radio"/>    Extremely stressful</p>                                                                                                                   |
| <p>7. How formative was this workshop to you?</p> <p style="text-align: center;">1    2    3    4</p> <p>Not formative at all    <input type="radio"/>    <input type="radio"/>    <input type="radio"/>    <input type="radio"/>    Extremely formative</p>                                                                                                                   |
| <p>8. What did you think about the duration of this workshop?</p> <p style="text-align: center;">1    2    3    4</p> <p>Too short    <input type="radio"/>    <input type="radio"/>    <input type="radio"/>    <input type="radio"/>    Too long</p>                                                                                                                         |
| <p>9. Were the instructions of this workshop understandable?</p> <p style="text-align: center;">1    2    3    4</p> <p>Not understandable at all    <input type="radio"/>    <input type="radio"/>    <input type="radio"/>    <input type="radio"/>    Completely understandable</p>                                                                                         |
| <p>10. How much do you agree with the following statement: "at the end of this training, I feel more comfortable taking care of a patient with Raynaud phenomenon"?</p> <p style="text-align: center;">1    2    3    4</p> <p>Completely disagree    <input type="radio"/>    <input type="radio"/>    <input type="radio"/>    <input type="radio"/>    Completely agree</p> |
| <p>11. How much do you agree with the following statement: "at the end of this training, I feel more comfortable taking care of a patient with systemic sclerosis"?</p> <p style="text-align: center;">1    2    3    4</p> <p>Completely disagree    <input type="radio"/>    <input type="radio"/>    <input type="radio"/>    <input type="radio"/>    Completely agree</p> |
| <p>12. How much do you agree with the following statement: "I would recommend this training to other students"?</p> <p style="text-align: center;">1    2    3    4</p> <p>Completely disagree    <input type="radio"/>    <input type="radio"/>    <input type="radio"/>    <input type="radio"/>    Completely agree</p>                                                     |

13. How much do you agree with the following statement: "If possible, I would participate to this training again in the future"?

1      2      3      4  
Completely disagree               Completely agree

14. In your opinion, what were the strengths of this training?

---

---

---

---

15. In your opinion, what were the weaknesses of this training?

---

---

---

---

Do you have any extra comments on this training? (optional)

---

---

---

---
